# Supplementary material
Source: PubMed Central journal article supplement (PMC3029738)
Supplement: 1012108108_pnas.201012108SI.pdf [file 1012108108_pnas.201012108SI.pdf]

# Supporting Information

Soo et al. 10.1073/pnas.1012108108

## SI Materials and Methods

**Strains, Media, and Growth Conditions.** *Escherichia coli* strain DH5 $\alpha$ -E (Invitrogen) was used for all experiments. Strains were propagated in LB medium supplemented with chloramphenicol (34  $\mu\text{g}\cdot\text{mL}^{-1}$ ) at 37  $^{\circ}\text{C}$ , unless noted otherwise.

**Library-on-Library Screen.** The 5,272 plasmids from the ASKA (A Complete Set of *Escherichia coli* K-12 ORF Archive) library had been pooled previously (1) and were used to transform *E. coli* DH5 $\alpha$ -E. The same strain was transformed with the empty vector, pCA24N-NoIns, to yield a negative control. The ASKA pool and the negative control were grown to midlog phase ( $\text{OD}_{600} \sim 0.5$ ), before protein overexpression was induced by adding isopropyl- $\beta$ -D-thiogalactopyranoside (IPTG) (final concentration, 50  $\mu\text{M}$ ). After induction for 2 h, cells were harvested by centrifugation. The cell pellet was resuspended to  $\text{OD}_{600} \sim 0.2$  in sterile water, and 100  $\mu\text{L}$  of this cell suspension was added to IF-10 medium (Biolog Inc.) supplemented with 50  $\mu\text{M}$  IPTG, to a density of  $\sim 5 \times 10^5$  cells $\cdot\text{mL}^{-1}$ . The cell suspension was starved by incubating at room temperature for 1 h. Aliquots of each culture (100  $\mu\text{L}$ ) were used to inoculate the wells of phenotype microarray (PM) plates PM11 to PM20 (Biolog Inc.). The PM plates were incubated at 37  $^{\circ}\text{C}$  for 7 d. Growth in each well, as indicated by purple color development, was monitored visually and scored daily. Two independent replicates of the complete screen were performed.

**Serial Enrichment to Identify Resistance Genes.** For conditions in which the ASKA pool had reproducibly out-grown the negative control, fresh aliquots of the pool were now used to inoculate the corresponding wells of new PM plates. The plates were incubated at 37  $^{\circ}\text{C}$ . At the first sign of purple color development in a well (usually 24–72 h), a 2- $\mu\text{L}$  aliquot of the culture from that well was mixed with 98  $\mu\text{L}$  IF-10 medium (supplemented with 50  $\mu\text{M}$  IPTG) and transferred to the corresponding well of a new plate. After a second transfer (carried out in an identical fashion), cells from the final passage were spread on LB-chloramphenicol plates. The universal pCA24N-specific primers pCA24N.for and pCA24N.rev (1) were used to amplify the ASKA ORFs from at least eight of the resulting colonies. PCR products were sequenced to reveal each ORF that was responsible for enhanced growth.

**Relative Fitness Assays.** First, the negative control strain (*E. coli* DH5 $\alpha$ -E harboring pCA24N-NoIns) was marked with the *lacZ* gene (and a gentamicin resistance cassette), which was achieved using a mini-Tn7 system that integrates the marker downstream of the chromosomal *glmS* locus (2). The presence of a functional copy of *lacZ* allowed blue/white colony screening, where blue

colonies were the marked negative control and white colonies were the competitor. The relative fitness ( $W$ ) of the *lacZ*-marked negative control was shown to be identical to the unmarked negative control strain ( $W = 1.00 \pm 0.01$ , mean  $\pm$  SE;  $n = 8$  replicates;  $P = 0.93$ ).

Twenty-five ASKA plasmids that conferred increased growth in the presence of antibiotics were purified from individual clones and used to transform fresh aliquots of *E. coli* DH5 $\alpha$ -E. We measured the fitness of each of these strains, in the absence of antibiotics and in competition with the *lacZ*-marked negative control (which carried pCA24N-NoIns). In each experiment, single colonies of the ASKA strain and of the negative control were used to inoculate separate 5 mL aliquots of the competition medium (2.0 g $\cdot\text{L}^{-1}$  tryptone, 1.0 g $\cdot\text{L}^{-1}$  yeast extract, 1.0 g $\cdot\text{L}^{-1}$  NaCl, 34  $\mu\text{g}\cdot\text{mL}^{-1}$  chloramphenicol, and 50  $\mu\text{M}$  IPTG). This medium was used because it accurately represents growth conditions in the PM plates (3). The cultures were grown at 37  $^{\circ}\text{C}$  for 24 h, so that the two competing strains were preconditioned to the medium (4). Equal amounts of the two competing strains ( $\sim 10^6$  cfu per strain) were then mixed together in a fresh aliquot of the competition medium (5 mL), and the strains were grown in competition for another 24 h. The initial ( $t = 0$  h) and final ( $t = 24$  h) densities of each competitor were measured by spreading diluted aliquots of the culture on LB agar plates supplemented with chloramphenicol (34  $\mu\text{g}\cdot\text{mL}^{-1}$ ) and X-gal (40  $\mu\text{g}\cdot\text{mL}^{-1}$ ). The relative fitness,  $W$ , of the ASKA strain was estimated as the ratio of its number of doublings in 24 h, divided by the number of doublings of the *lacZ*-marked negative control (4). Eight replicates were carried out to estimate the mean relative fitness of each ASKA strain.

**Antibiotic Susceptibility Testing.** Next, the retransformed ASKA strains and the unmarked negative control strain from the fitness assays were grown to midlog phase before IPTG (final concentration, 50  $\mu\text{M}$ ) was added to induce protein overexpression for 2 h. Minimum inhibitory concentrations for aztreonam, cefuroxime, cephalothin, ciprofloxacin, erythromycin, nalidixic acid, nitrofurantoin, penicillin G, rifampicin, tobramycin and trimethoprim were determined using E-test strips (AB bioMérieux). A lawn of  $\sim 10^6$  cells was spread on Mueller-Hinton agar plates supplemented with IPTG (50  $\mu\text{M}$ ). The relevant E-test strip was placed on top of the lawn and the agar plates were incubated at 37  $^{\circ}\text{C}$  for 24 h. MICs for benzethonium chloride, enoxacin, lincomycin, oxytetracycline, puromycin, sisomicin, spiramycin, sulfadiazine, and vancomycin were determined in Mueller-Hinton broth, using a microdilution method (5). Reported minimum inhibitory concentrations values are the average of at least two independent experiments.

1. Patrick WM, Quandt EM, Swartzlander DB, Matsumura I (2007) Multicopy suppression underpins metabolic evolvability. *Mol Biol Evol* 24:2716–2722.  
2. Choi KH, et al. (2005) A Tn7-based broad-range bacterial cloning and expression system. *Nat Methods* 2:443–448.  
3. Zhou L, Lei XH, Bochner BR, Wanner BL (2003) Phenotype microarray analysis of *Escherichia coli* K-12 mutants with deletions of all two-component systems. *J Bacteriol* 185:4956–4972.

4. Lenski RE, Rose MR, Simpson SC, Tadler SC (1991) Long-term experimental evolution in *Escherichia coli*. I. Adaptation and divergence during 2000 generations. *Am Nat* 138:1315–1341.  
5. Wiegand I, Hilpert K, Hancock REW (2008) Agar and broth dilution methods to determine the minimal inhibitory concentration (MIC) of antimicrobial substances. *Nat Protoc* 3:163–175.

**Table S1. Genes that confer increased resistance to more than one toxic compound**

| Gene        | Gene product                                           | Frequency* | Toxic compounds                                                                                      | Mechanism of resistance                                                          |
|-------------|--------------------------------------------------------|------------|------------------------------------------------------------------------------------------------------|----------------------------------------------------------------------------------|
| <i>galE</i> | UDP-glucose 4-epimerase                                | 7          | Amitriptyline, chlorpromazine, nalidixic acid, orphenadrine, pridinol, thioridazine, trifluoperazine | Envelope/capsule biosynthesis                                                    |
| <i>bcr</i>  | Bcr multidrug transporter                              | 6          | Cefoperazone, oxytetracycline, rolitetracycline, sulfachloropyridazine, sulfathiazole, sulfisoxazole | Efflux/transport                                                                 |
| <i>ycgZ</i> | Small protein induced by YcgF                          | 6          | Aztreonam, cefmetazole, cefuroxime, moxalactam, penimepicycline, sulfamethazine                      | Stress response                                                                  |
| <i>ydaC</i> | Uncharacterized protein from Rac prophage              | 6          | Caffeine, chelerythrine, erythromycin, phenethicillin, plumbagin, sanguinarine                       | Prophage gene                                                                    |
| <i>marA</i> | MarA transcriptional activator                         | 5          | Ciprofloxacin, ofloxacin, penimepicycline, proflavine, tylosin                                       | Regulatory effect                                                                |
| <i>mdtM</i> | MdtM multidrug transporter                             | 5          | 5-Nitro-2-furaldehyde, crystal violet, furaldone, puromycin, tinidazole                              | Efflux/transport                                                                 |
| <i>cpdA</i> | cAMP phosphodiesterase                                 | 4          | Dihydrostreptomycin, hydroxyurea, josamycin, L-aspartic- $\beta$ -hydroxamate                        | Regulatory effect                                                                |
| <i>csiE</i> | Stationary phase-inducible protein                     | 4          | 3,4-Dimethoxybenzyl alcohol, antimony (III) chloride, blasticidin S, guanidine hydrochloride,        | Stress response                                                                  |
| <i>rbsR</i> | Ribose transcriptional repressor                       | 4          | Aztreonam, lincomycin, sulfamethazine, sulfamonomethoxine                                            | Regulatory effect                                                                |
| <i>ycbS</i> | Uncharacterized outer membrane $\beta$ -barrel protein | 4          | 9-Aminoacridine, FCCP, methyl viologen, sanguinarine                                                 | Efflux/transport                                                                 |
| <i>ydfW</i> | Uncharacterized protein from Qin prophage              | 4          | Chelerythrine, erythromycin, oleandomycin, spiramycin,                                               | Prophage gene                                                                    |
| <i>bdm</i>  | Biofilm-dependent modulation protein                   | 3          | Cefazolin, cephalothin, nafcillin                                                                    | Biofilm formation & regulation                                                   |
| <i>cmr</i>  | MdfA/Cmr multidrug transporter                         | 3          | Dodecyltrimethyl ammonium bromide, lincomycin, sodium dichromate                                     | Efflux/transport                                                                 |
| <i>yejG</i> | Uncharacterized protein                                | 3          | Apramycin, sisomicin, tobramycin                                                                     | Unknown                                                                          |
| <i>folA</i> | Dihydrofolate reductase                                | 2          | 2,4-Diamino-6,7-diisopropyl-pteridine, trimethoprim                                                  | Catalytic promiscuity and/or substrate ambiguity; over-expression of drug target |
| <i>hcaR</i> | Hca operon transcriptional activator                   | 2          | Fusidic acid, sodium <i>m</i> -arsenite                                                              | Regulatory effect                                                                |
| <i>tusE</i> | Sulfurtransferase                                      | 2          | Rifampicin, spiramycin                                                                               | Catalytic promiscuity and/or substrate ambiguity                                 |
| <i>yfdO</i> | Uncharacterized protein from CPS-53 [KpLE1] prophage   | 2          | Lidocane, nalidixic acid                                                                             | Prophage gene                                                                    |

\*The number of PM wells from which the ASKA-encoded gene was isolated.

## Other Supporting Information Files

[Dataset S1 \(XLS\)](#)

[Dataset S2 \(XLSX\)](#)
